# Supplementary material
Source: MDPI journal article supplement (https://www.mdpi.com/2073-445X/10/10/1053)
Supplement: s1 [file s1]

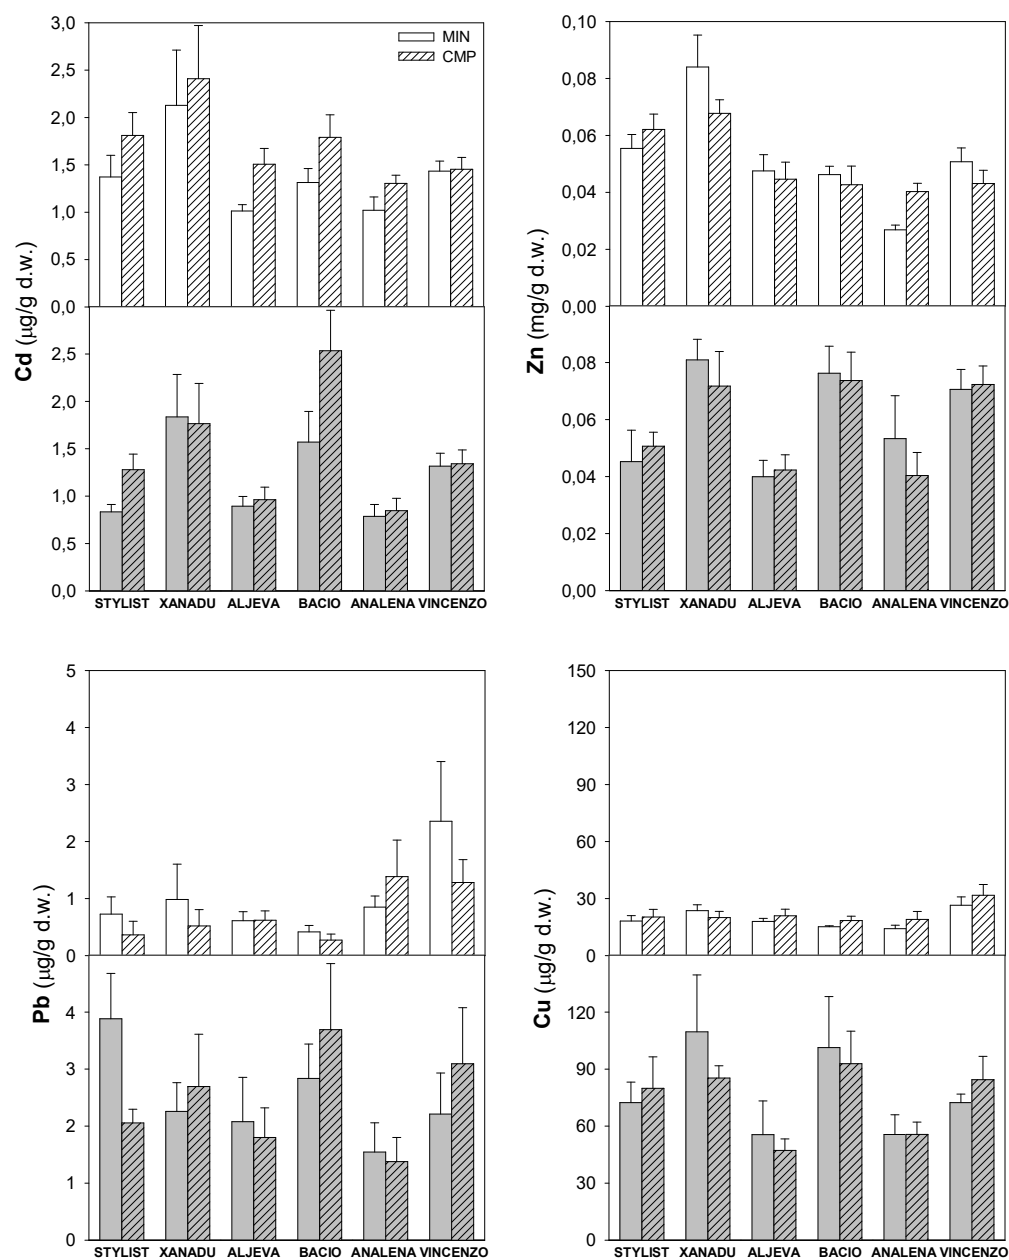

**Figure S1.** Mean Cd, Pb, Zn and Cu concentrations ( $\pm$  standard errors) measured in the leaves (white bars) and roots (grey bars) of the six lettuce cultivars grown on soil treated with mineral fertilizers (MIN) and on soil amended with biowaste compost (CMP).

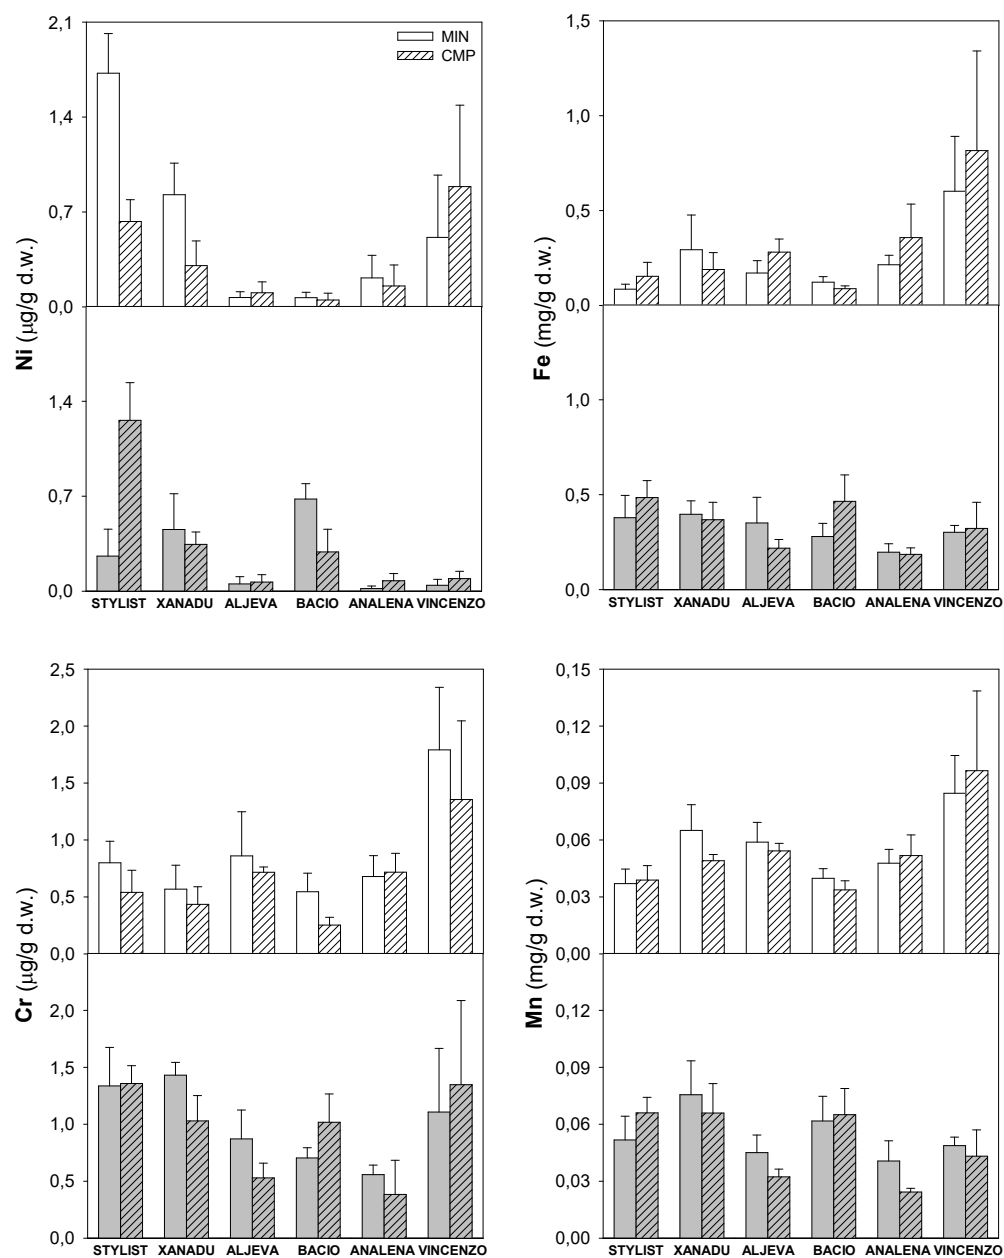

**Figure S2.** Mean Ni, Cr, Fe and Mn concentrations (± standard errors) measured in the leaves (white bars) and roots (grey bars) of the six lettuce cultivars grown on soil treated with mineral fertilizers (MIN) and on soil amended with biowaste compost (CMP).

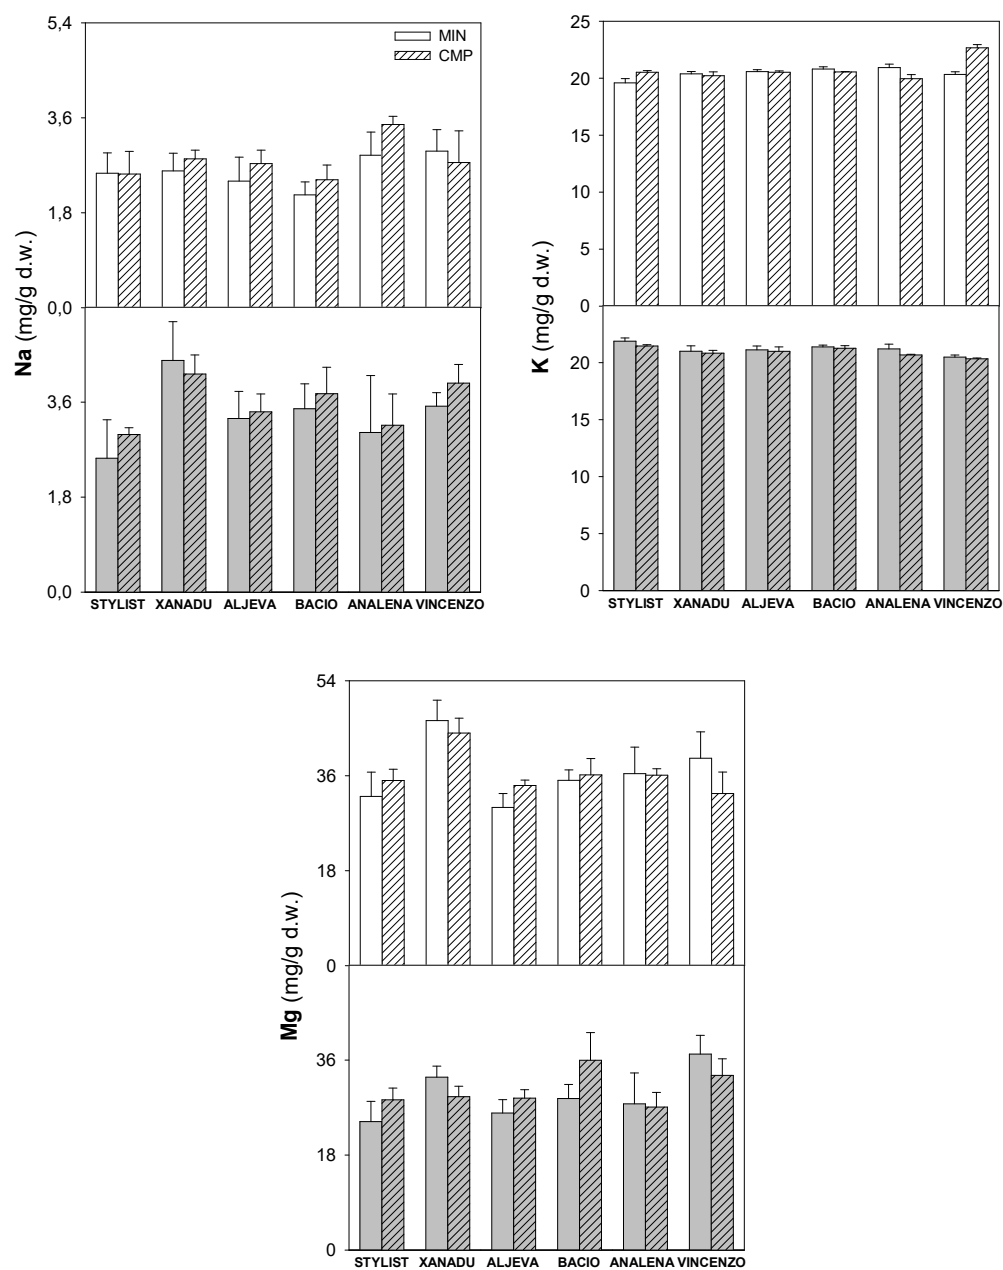

**Figure S3.** Mean Na, K and Mg concentrations ( $\pm$  standard errors) measured in the leaves (white bars) and roots (grey bars) of the six lettuce cultivars grown on soil treated with mineral fertilizers (MIN) and on soil amended with biowaste compost (CMP).
